CORRECTION

## Correction: Associations between physical activity, physical fitness, and body composition in adults living in Germany: A cross-sectional study

Raphael Schilling, Steffen C. E. Schmidt, Janis Fiedler, Alexander Woll

In the Physical fitness subsection of the Materials and methods, the equation shows an incorrect formula for calculating the Z-scores. Please view the complete, correct equation here:

$$Z = 100 + \frac{\text{raw value} - \bar{x}}{\bar{s}} \cdot 10$$

$\bar{x}$  = mean value of the 33-36-year-old men at the first time of measurement in 1992,

$\bar{s}$  = standard deviation of the 33-36-year-old men at the first time of measurement in 1992

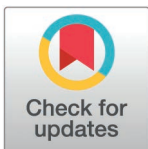

### Reference

- Schilling R, Schmidt SCE, Fiedler J, Woll A. Associations between physical activity, physical fitness, and body composition in adults living in Germany: A cross-sectional study. PLoS One. 2023;18(10):e0293555. <https://doi.org/10.1371/journal.pone.0293555> PMID: [37883524](https://pubmed.ncbi.nlm.nih.gov/37883524/)

### OPEN ACCESS

**Citation:** Schilling R, Schmidt SCE, Fiedler J, Woll A (2026) Correction: Associations between physical activity, physical fitness, and body composition in adults living in Germany: A cross-sectional study. PLoS One 21(1): e0341576. <https://doi.org/10.1371/journal.pone.0341576>

**Published:** January 21, 2026

**Copyright:** © 2026 Schilling et al. This is an open access article distributed under the terms of the [Creative Commons Attribution License](https://creativecommons.org/licenses/by/4.0/), which permits unrestricted use, distribution, and reproduction in any medium, provided the original author and source are credited.
